# Supplementary material
Source: publisher site journal article supplement (https://www.spandidos-publications.com/7863/downloadSupplementary)
Supplement: Supplementary file 1 [file downloadSupplementary]

Figure S1. (A) Two-dimensional schematic illustrating the interaction between quercetin and CYP1B1, displaying the chemical structure of quercetin at the center, surrounded by circles representing specific protein residues involved in the interaction. (B) Table describing the results of molecular docking of Que and a negative control reagent to the CYP1B1 protein. CYP1B1, cytochrome P450 family 1 subfamily B member 1.

A

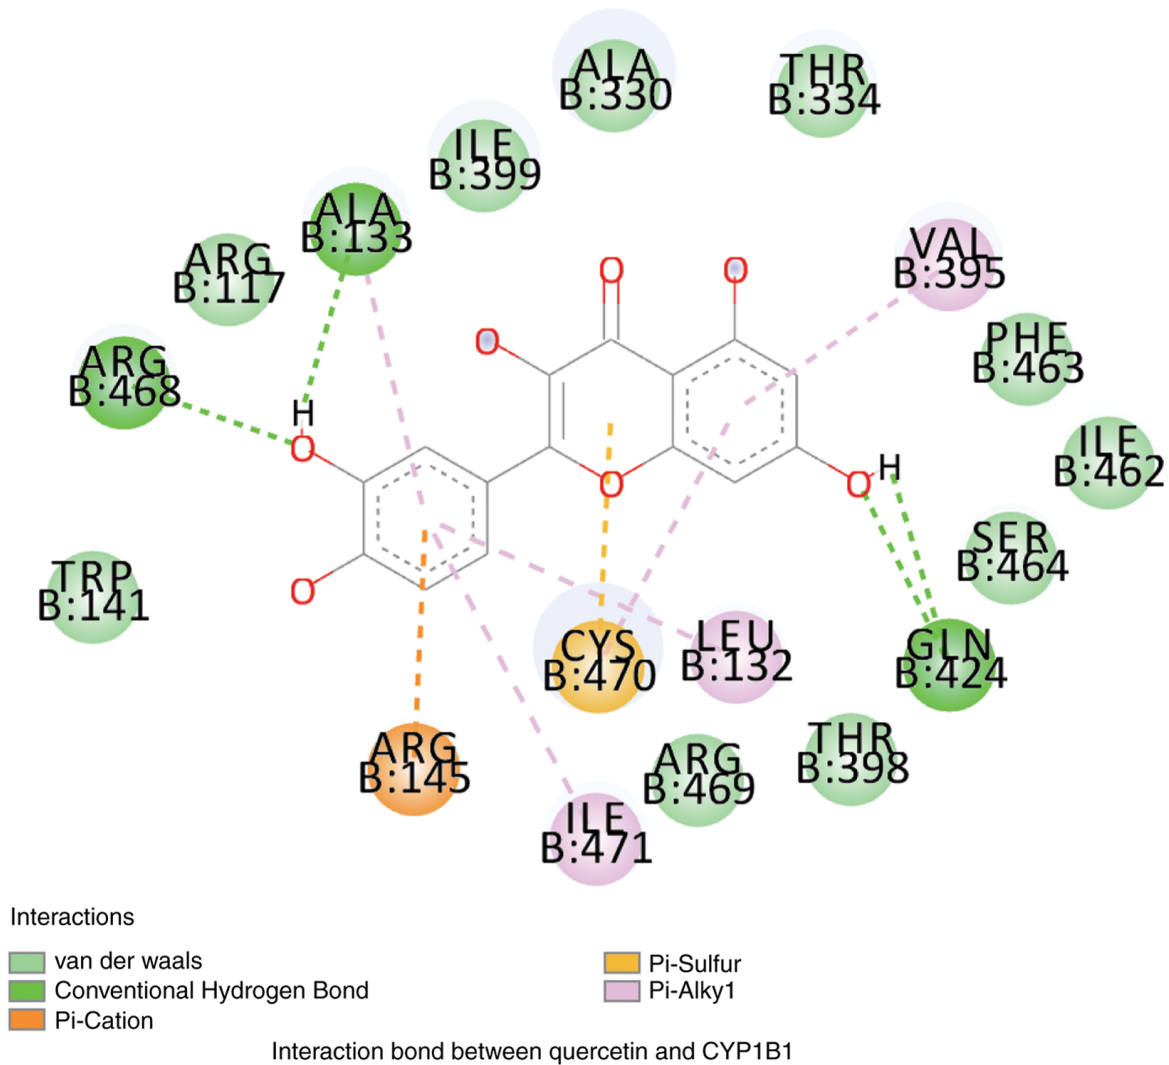

B

Molecular docking of CYP1B1 with drugs

| Gene   | Compound    | Binding energy (kcal/mol) |
|--------|-------------|---------------------------|
| CYP1B1 | Quercetin   | -8.9                      |
| CYP1B1 | Paracetamol | -5.8                      |
| CYP1B1 | Aspirin     | -6.4                      |
| CYP1B1 | Caffeine    | -5.7                      |
